# Supplementary material for: Assessment of the effects of nutrients on biomass and lipid accumulation in Dunaliella tertiolecta using a response surface methodology
Source: Royal Society of Chemistry journal article supplement (doi:10.1039/c4ra04192e), 2014-08-20
Supplement: c4ra04192e1.pdf [file c4ra04192e1.pdf]

Table 1: Effects of different NaNO<sub>3</sub> concentrations on algal biomass, lipid content per cell and lipid productivity

|                                                       | Concentrations of NaNO <sub>3</sub> (g/L) |               |               |               |               |
|-------------------------------------------------------|-------------------------------------------|---------------|---------------|---------------|---------------|
|                                                       | 0.21                                      | 0.42          | 1.68          | 10.08         | 20.16         |
| Biomass(mg/L)                                         | 320.2±1.23                                | 277.6±2.08    | 253.4±1.94    | 245.8±2.36    | 225.0±2.45    |
| Lipid content per cell<br>(mg×10 <sup>-5</sup> /cell) | 4.09±0.112                                | 5.89±0.203    | 6.01±0.562    | 6.18±0.362    | 5.90±0.307    |
| Lipid productivity<br>(mg/ml/day)                     | 0.6432±0.0093                             | 0.7286±0.0101 | 0.7628±0.0121 | 0.7628±0.0113 | 0.6731±0.0156 |

Table 2: Effects of different NaHCO<sub>3</sub> concentrations on algal biomass, lipid content per cell and lipid productivity

|                                                       | Concentrations of NaHCO <sub>3</sub> (g/L) |               |               |               |               |
|-------------------------------------------------------|--------------------------------------------|---------------|---------------|---------------|---------------|
|                                                       | 0.21                                       | 1.68          | 5.04          | 6.72          | 13.44         |
| Biomass (mg/L)                                        | 448.1±2.01                                 | 548.9±3.10    | 491.1±2.84    | 440.1±2.37    | 426.0±1.67    |
| Lipid content per cell<br>(mg×10 <sup>-5</sup> /cell) | 5.31±0.231                                 | 4.74±0.316    | 5.41±0.195    | 6.39±0.206    | 5.98±0.253    |
| Lipid productivity<br>(mg/ml/day)                     | 1.0449±0.0413                              | 1.1303±0.0205 | 1.1603±0.0317 | 1.2350±0.0326 | 1.1218±0.0387 |

Table 3: Effects of different NaCl concentrations on algal biomass, lipid content per cell and lipid productivity

|                                                       | Concentrations of NaCl (M) |             |             |            |            |
|-------------------------------------------------------|----------------------------|-------------|-------------|------------|------------|
|                                                       | 0.5                        | 1.5         | 2.5         | 3.5        | 4.5        |
| Biomass (mg/L)                                        | 326.4±2.77                 | 383.3 ±3.04 | 295.6 ±2.78 | 195.3±3.05 | 19.9±2.33  |
| Lipid content per cell<br>(mg×10 <sup>-5</sup> /cell) | 6.37±0.174                 | 5.84±0.117  | 5.69±0.165  | 6.28±0.183 | 8.98±0.162 |

|                                |               |               |               |               |               |
|--------------------------------|---------------|---------------|---------------|---------------|---------------|
| Lipid productivity (mg/ml/day) | 0.8951±0.0754 | 0.9568±0.0809 | 0.7276±0.0665 | 0.5432±0.0674 | 0.1821±0.0544 |
|--------------------------------|---------------|---------------|---------------|---------------|---------------|

Table 4: Effects of different  $\text{NaH}_2\text{PO}_4 \cdot 2\text{H}_2\text{O}$  concentrations on algal biomass, lipid content per cell and lipid productivity

|                                                      | Concentrations of $\text{NaH}_2\text{PO}_4 \cdot 2\text{H}_2\text{O}$ (g/L) |                |               |               |                |
|------------------------------------------------------|-----------------------------------------------------------------------------|----------------|---------------|---------------|----------------|
|                                                      | 0.003                                                                       | 0.015          | 0.075         | 0.275         | 1.875          |
| Biomass (mg/L)                                       | 206.0±4.09                                                                  | 311.1 ±3.87    | 319.5 ±2.18   | 287.5 ±2.21   | 175.6±2.05     |
| Lipid content per cell (mg × 10 <sup>-5</sup> /cell) | 8.4±0.15                                                                    | 7.1±0.21       | 6.3±0.14      | 7.1±0.23      | 6.0±0.18       |
| Lipid productivity (mg/ml/day)                       | 0.8141 ±0.0232                                                              | 0.9893 ±0.0531 | 0.9038±0.0443 | 0.9274±0.0522 | 0.5107 ±0.0339 |

Table 5: Effects of different Fe-EDTA solution concentrations on algal biomass, lipid content per cell and lipid productivity

|                                                      | Concentrations of Fe-EDTA solution (ml/L) |               |               |                |               |
|------------------------------------------------------|-------------------------------------------|---------------|---------------|----------------|---------------|
|                                                      | 0                                         | 0.1           | 0.5           | 2.5            | 12.5          |
| Biomass (mg/L)                                       | 377.4±2.44                                | 405.7 ±2.63   | 358.7±1.86    | 339.6 ±3.11    | 118.5±3.22    |
| Lipid content per cell (mg × 10 <sup>-5</sup> /cell) | 5.8±0.05                                  | 5.6±0.06      | 5.7±0.04      | 7.4±0.12       | 1.7±0.09      |
| Lipid productivity (mg/ml/day)                       | 0.9600±0.0555                             | 0.9860±0.0464 | 0.8837±0.0352 | 1.0821 ±0.0478 | 0.7448±0.0501 |

Table 6: Effects of different  $\text{MgSO}_4 \cdot 7\text{H}_2\text{O}$  concentrations on algal biomass, lipid content per cell and lipid productivity

|                | Concentrations of $\text{MgSO}_4 \cdot 7\text{H}_2\text{O}$ (g/L) |            |             |            |             |
|----------------|-------------------------------------------------------------------|------------|-------------|------------|-------------|
|                | 0.5                                                               | 1          | 2           | 4          | 8           |
| Biomass (mg/L) | 485.9±4.37                                                        | 497.9±3.88 | 445.4 ±3.94 | 469.3±2.16 | 428.0 ±2.38 |

|                             |          |          |          |          |          |
|-----------------------------|----------|----------|----------|----------|----------|
| Lipid content               |          |          |          |          |          |
| per cell                    | 4.8±0.08 | 4.8±0.02 | 5.5±0.07 | 5.3±0.03 | 4.8±0.05 |
| (mg×10 <sup>-5</sup> /cell) |          |          |          |          |          |
| Lipid                       |          |          |          |          |          |
| productivity                | 0.9966   | 1.0180   | 1.0546   | 1.0897   | 0.8959   |
| (mg/ml/day)                 |          |          |          |          |          |

Table 7: Effects of different CaCl<sub>2</sub>•2H<sub>2</sub>O concentrations on algal biomass, lipid content per cell and lipid productivity

|                             | Concentrations of CaCl <sub>2</sub> •2H <sub>2</sub> O (g/L) |               |               |               |               |
|-----------------------------|--------------------------------------------------------------|---------------|---------------|---------------|---------------|
|                             | 0                                                            | 0.01          | 0.05          | 0.1           | 0.15          |
| Biomass (mg/L)              | 492.4±3.17                                                   | 587.3 ±3.65   | 436.7±2.88    | 636.0±3.06    | 412.5±2.53    |
| Lipid content               |                                                              |               |               |               |               |
| per cell                    | 3.3±0.11                                                     | 3.6±0.08      | 4.6±0.06      | 3.9±0.13      | 4.6±0.08      |
| (mg×10 <sup>-5</sup> /cell) |                                                              |               |               |               |               |
| Lipid                       |                                                              |               |               |               |               |
| productivity                | 0.7082 ±0.0664                                               | 0.9005±0.0706 | 0.8639±0.0388 | 1.0470±0.0466 | 0.8257±0.0452 |
| (mg/ml/day)                 |                                                              |               |               |               |               |
