# Supplementary figures and images for: Assessment of the effects of nutrients on biomass and lipid accumulation in Dunaliella tertiolecta using a response surface methodology
Source: Royal Society of Chemistry journal article supplement (doi:10.1039/c4ra04192e), 2014-08-20

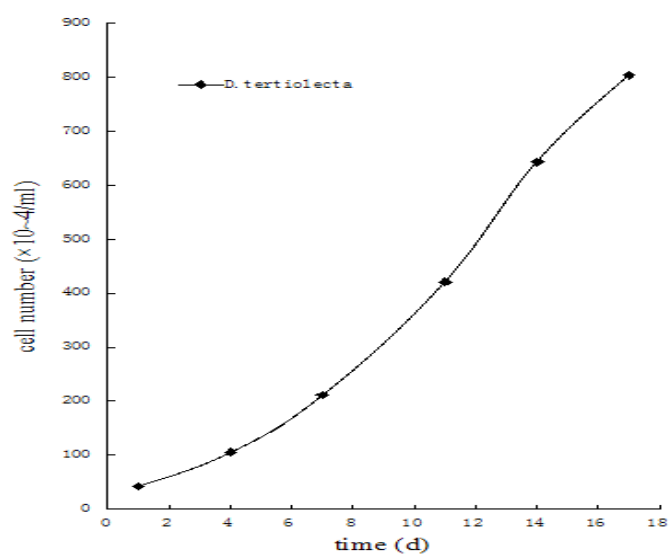

Figure 1: The growth curve of green algae *Dunaliella tertiolecta*

Supplement: c4ra04192e2.pdf [file c4ra04192e2.pdf]
